# Supplementary material for: Network-risk: an open GIS toolbox for estimating the implications of transportation network damage due to natural hazards, tested for Bucharest, Romania
Source: Copernicus journal article supplement (doi:10.5194/nhess-2019-409), 2020-01-08
Supplement: Supplementary file [file nhess-2019-409-AC2-supplement.pdf]

# ***Interactive comment on “Network-risk: an open GIS toolbox for estimating the implications of transportation network damage due to natural hazards, tested for Bucharest, Romania” by Dragos Toma-Danila et al.***

**Mihai Micu (Referee)**

mikkutu@yahoo.com

Received and published: 17 February 2020

1. General comments: the authors are presenting an approach which might have a consistent application (not only for Romania, but worldwide) in terms of exposure/vulnerability/risk analysis. Moreover, there are numerous stakeholders which may show practical interest in this application, both coming from the prevention/preparedness or response/recovery parts of the risk management spectrum. The manuscript follows a rather clear and logic structure. There are consistent chapters devoted to methodology, results but **not so much discussions**, overall witnessing a good

[Printer-friendly version](#)

[Discussion paper](#)

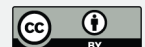

knowledge of the authors in both theoretical and applied issues. The manuscript is written in good English (sometimes with **long sentences**) and the graphic part is (mostly) clear and strongly backs-up the written text. 2. Specific comments: to our opinion, the structure of the manuscript could be improved by **rearranging the text according to the chapters**. Consistent paragraphs in the Results chapter (e.g. those following line 250) are more fit to the Methodology chapter; meanwhile, at Results there are considerations which we find more suitable for the description of the study area (see Fig.6). There are some references which deserves an update (some 10-15 years old; **see lines 26, 58, 82, 152**), since in the recent years, similar applications have been developed (**see rupok.cz**). In our opinion, a consistent part of the discussions should be devoted to the following issue: **how useful is such an application and which is its effectiveness?** As mentioned by the authors, it is important not for the scientists, but a more consistent part should be devoted to: which is the main outcome - improved exposure analysis or improved vulnerability assessment; how it might improve the cost-benefit analysis if it **addresses risk evaluation** (as written in the abstract); which is its main applicability - prevention or response (since based on this, different stakeholders should be interested); **was any feed-back** requested in this respect? In the mean time, the authors are mentioning numerous **uncertainties** behind such an approach, which brought in the same context with its high applicability, deserve a larger explanation which could rank its effectiveness. 3. Technical corrections: - the graphic part may be improved by replacing some of the written names: Fig.6 - **better if the names are in the legend**, since on the map they look rather general. - **lines 110-111**: difficult to understand, is there something missing? "... to be considered" maybe? - **line 177**: already mentioned; - line 223: an explanation of the statement **"very well updated and representative"** is needed; - **there are names which sometimes are in English, sometimes in Romanian** (e.g. Piata Universitatii vs. University Square); they should all follow the same writing.

---

Interactive comment on Nat. Hazards Earth Syst. Sci. Discuss., <https://doi.org/10.5194/nhess-2019-409>, 2020.
