# Supplementary material for: Network-risk: an open GIS toolbox for estimating the implications of transportation network damage due to natural hazards, tested for Bucharest, Romania
Source: Copernicus journal article supplement (doi:10.5194/nhess-2019-409), 2020-01-08

## ***Interactive comment on “Network-risk: an open GIS toolbox for estimating the implications of transportation network damage due to natural hazards, tested for Bucharest, Romania” by Dragos Toma-Danila et al.***

### **Anonymous Referee #3**

Received and published: 26 February 2020

a. Considering that Bucharest represents one of the most exposed capitals in Europe to strong earthquakes that has a poor and crowded road infrastructure, this paper represents an important step for future worldwide studies. We consider that the paper is written in good English and that the figures are clear and easy to understand. b. Form our point of view the manuscript could be reorganised a little bit. **Some paragraphs fit much better in different sections** (e.g. from results moved to methodology). c. **We consider that a discussions chapter** should be defined in order to explain/ describe the efficiency of the methods and algorithms described in the paper and their associated

[Printer-friendly version](#)

[Discussion paper](#)

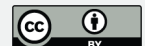

errors. d. [Some newer references could be added](#) in the review of current studies.

Interactive comment on Nat. Hazards Earth Syst. Sci. Discuss., <https://doi.org/10.5194/nhess-2019-409>, 2020.

NHESSD

Interactive  
comment

[Printer-friendly version](#)

[Discussion paper](#)

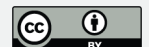

Supplement: Supplementary file [file nhess-2019-409-AC3-supplement.pdf]
